# Supplementary material for: Expression Patterns of Cancer-Testis Antigens in Human Embryonic Stem Cells and Their Cell Derivatives Indicate Lineage Tracks
Source: PubMed Central journal article supplement (PMC3140037; doi:10.4061/2011/795239), 2011-07-18
Supplement: 795239.f1.pdf [file 795239.f1.pdf]

**Table S1: RT-PCR primers for human genes studied**

| <b>Gene</b> | <b>Product (bp)</b> | <b>Primer sequences</b>           | <b>Accession no.</b> |
|-------------|---------------------|-----------------------------------|----------------------|
| OCT4/POU5F1 | 259                 | 5'gggtggaggaagctgacaac3' forward  | NM_002701            |
|             |                     | 5'gcatagtcgctgcttgatcg3' reverse  | NM_203289            |
| NANOG       | 368                 | 5'tgcctcacacggagactgtc3' forward  | NM_024865            |
|             |                     | 5'ctgcgtcacaccattgtattc3' reverse |                      |
| GATA4       | 352                 | 5'tcceaaccagaaaacggaag3' forward  | NM_002052            |
|             |                     | 5'aagaccaggctgtccaaga3' reverse   |                      |
| AFP         | 312                 | 5'gcggcctctccagaaacta3' forward   | NM_001134            |
|             |                     | 5'ttcatccaccaccaagctg3' reverse   |                      |
| BRY         | 353                 | 5'agcatcccttgctcacacct3' forward  | NM_003181            |
|             |                     | 5'acattctagggggcagagca3' reverse  |                      |
| NES         | 318                 | 5'agcgttggaacagaggttg3' forward   | NM_006617            |
|             |                     | 5'tgggagcaaagatccaagac3' reverse  |                      |
| MAGEA2      | 545                 | 5'gggacaggctgacaagtagg3' forward  | NM_005361            |
|             |                     | 5'tctgaggacactctccagca3' reverse  | NM_175742            |
|             |                     |                                   | NM_175743            |
| MAGEA3,6    | 399                 | 5'ttaggaaggtggccgagttg3' forward  | NM_005362            |
|             |                     | 5'tgggatccccaagatactg3' reverse   | NM_005363            |
|             |                     |                                   | NM_175868            |
| MAGEA4      | 383                 | 5'tcaggagcctctgccttac3' forward   | NM_001011548         |
|             |                     | 5'tattaccagcaggccatca3' reverse   | NM_002362            |
|             |                     |                                   | NM_001011549         |
|             |                     |                                   | NM_001011550         |

|                                                                    |     |                                      |              |
|--------------------------------------------------------------------|-----|--------------------------------------|--------------|
| MAGEA8                                                             | 319 | 5'tccagcagcaatgaagagga3' forward     | NM_005364    |
|                                                                    |     | 5'gcaggccatcataggagag3' reverse      |              |
| MAGEB2                                                             | 222 | 5'aggacccgagcgagtgtag3' forward      | NM_002364    |
|                                                                    |     | 5'ccccagaaacagaagaggaa3' reverse     |              |
| MAGED1                                                             | 247 | 5'cctccgttctaccatgaga3' forward      | NM_001005333 |
|                                                                    |     | 5'ccaggtcagcagctcaaact3' reverse     | NM_006986    |
|                                                                    |     |                                      | NM_001005332 |
| MAGED2                                                             | 561 | 5'aaagccacagaggtctcaa3' forward      | NM_014599    |
|                                                                    |     | 5'cgggctttagtgatctcag3' reverse      | NM_177433    |
|                                                                    |     |                                      | NM_201222    |
| GAGE1,2A,2B,<br>2C,2D,2E,10,12<br>C,12D,12E,12G,<br>12H,12I,12J,13 | 238 | 5'ctgagattcatctgtgtgaaatga3' forward | NM_001468    |
|                                                                    |     | 5'aggcttcggccttga3' reverse          | NM_001040663 |
|                                                                    |     |                                      | NM_001127212 |
|                                                                    |     |                                      | NM_001098411 |
|                                                                    |     |                                      | NM_001472    |
|                                                                    |     |                                      | NM_001098407 |
|                                                                    |     |                                      | NM_001127200 |
|                                                                    |     |                                      | NM_001098413 |
|                                                                    |     |                                      | NM_001098408 |
|                                                                    |     |                                      | NM_001127199 |
|                                                                    |     |                                      | NM_001098418 |
|                                                                    |     |                                      | NM_001098409 |
|                                                                    |     |                                      | NM_001098410 |
|                                                                    |     |                                      | NM_001477    |
|                                                                    |     |                                      | NM_001098406 |
|                                                                    |     |                                      | NM_001098412 |

RPL19

326

5'agggtacagccaatgcccg3' forward

NM\_000981

5'ccttgataaagtcttgatgatc3' reverse

---

**Table S2:** RT-PCR primers for mouse genes studied

| <b>Gene</b>      | <b>Product (bp)</b> | <b>Primer sequences</b>             | <b>Accession no.</b> |
|------------------|---------------------|-------------------------------------|----------------------|
| Oct-4/Pou5f1     | 621                 | 5'tggagactttgcagcctgag3' forward    | NM_013633            |
|                  |                     | 5'catactcttctcgttgggatta3' reverse  |                      |
| Nanog            | 702                 | 5'caagcgggtggcagaaaaac3' forward    | NM_028016            |
|                  |                     | 5'tggataagagcaccgactg3' reverse     |                      |
| Magea4           | 224                 | 5'tcggagccaaaggagtag3' forward      | NM_020280            |
|                  |                     | 5'tgcacagtgggtcttctgt3' reverse     |                      |
| Magea1,2,3,5,6,8 | 361                 | 5'actggcctccatccctgata3' forward    | NM_020015            |
|                  |                     | 5'cttgggcataccctggacat3' reverse    | NM_020016            |
|                  |                     |                                     | NM_020017            |
|                  |                     |                                     | NM_020018            |
|                  |                     |                                     | NM_020019            |
|                  |                     |                                     | NM_020020            |
| Mageb3           | 125                 | 5'tcaaatgggtttcacacacg3' forward    | NM_008545            |
|                  |                     | 5'aattttatggttgggggtca3' reverse    |                      |
| Mageb1,2,3       | 435                 | 5'gttccagtagttcagcccactgc3' forward | NM_010759            |
|                  |                     | 5'agtgctgggatcaattccttc3' reverse   | NM_031171            |
|                  |                     |                                     | NM_008545            |
| Maged1           | 509                 | 5'aaggggccaatgattactctcag3' forward | NM_019791            |
|                  |                     | 5'tgatccccactgttcttctt3' reverse    |                      |
| Maged2           | 309                 | 5'cagtgaccagagtcaggcttc3' forward   | NM_030700            |
|                  |                     | 5'gagcgtctgatgggaatctt3' reverse    |                      |
| Hprt             | 249                 | 5'gctggtgaaaaggacctct3' forward     | NM_013556            |
|                  |                     | 5'cacaggactagaacacctgc3' reverse    |                      |
